# Supplementary material for: Protective Effect of Lactiplantibacillus plantarum subsp. plantarum SC-5 on Dextran Sulfate Sodium—Induced Colitis in Mice
Source: MDPI journal article supplement (doi:10.3390/foods12040897), 2023-02-20
Supplement: s1 [file s1]

**Table S1.** DAI score

| Score | Percentage of weight loss | Fecal viscosity     | Blood stool       |
|-------|---------------------------|---------------------|-------------------|
| 0     | 0                         | Normal              | Negative          |
| 1     | 1-5%                      | Loose stool         | Cambridge blue    |
| 2     | 5-10%                     | Mucoid stool        | Blue              |
| 3     | 10-20%                    | Dilute liquid stool | Dark blue         |
| 4     | >20%                      |                     | Gross blood stool |

**Table S2.** Histopathology score

| Score | The number of ulcers | The changes in Epithelial cells                   | The degree of inflammatory infiltration                                                           | The number of lymph nodes |
|-------|----------------------|---------------------------------------------------|---------------------------------------------------------------------------------------------------|---------------------------|
| 0     | 0                    | Normal                                            | None                                                                                              | None                      |
| 1     | 1                    | A small loss of goblet cells                      | Pericrypt inflammatory infiltrate                                                                 | 1                         |
| 2     | 2                    | Extensive loss of goblet cells                    | Inflammatory infiltration in muscularis mucosae                                                   | 2                         |
| 3     | 3                    | Loss of crypts                                    | The muscularis mucosae were generally infiltrated with inflammation and the mucosa was thickened. | 3                         |
| 4     | >3                   | Extensive loss of crypts or Polypoid regeneration | Inflammatory infiltration of the submucosa                                                        | >3                        |
